# Supplementary material
Source: publisher figshare collection journal article supplement (https://diabetesjournals.figshare.com/articles/dataset/_/24534463)
Supplement: Supplementary file 1 [file 1]

# Supplementary Appendix

## **Comparative effects of randomized second-line therapy for type 2 diabetes on a composite outcome incorporating glycemic control, body weight, and hypoglycemia: An analysis of the Glycemia Reduction Approaches in Type 2 Diabetes - A Comparative Effectiveness (GRADE) Study**

Writing Group: M. Sue Kirkman, MD\*; Mark Tripputi, PhD; Heidi Krause-Steinrauf, MS; Ionut Bebu, PhD; Hiba Abouassi, MD; Henry Burch, MD; Elizabeth Duran-Valdez, MS; Hermes Florez, MD, PhD, MPH; W. Timothy Garvey, MD; Daniel S. Hsia, MD; Maamoun Salam, MD; and Rodica Pop-Busui, MD, PhD\* for the GRADE Research Group\*\*

\* Writing Group Co-Chairs

\*\*The GRADE Study Research Group is provided below

### Table of Contents

|                                                                                                                                                                                      |           |
|--------------------------------------------------------------------------------------------------------------------------------------------------------------------------------------|-----------|
| <b>GRADE Research Group Listing .....</b>                                                                                                                                            | <b>2</b>  |
| <b>Supplementary Table 1.</b> Baseline table of the GRADE participant cohort (n=5,047) by treatment group .....                                                                      | <b>6</b>  |
| <b>Supplementary Table 2.</b> The percent change in treatment effect on the risk of the composite outcome after adjustment for potential mediators .....                             | <b>8</b>  |
| <b>Supplementary Table 3.</b> Treatment group comparisons of outcomes by rescue insulin status among participants who initiated rescue insulin at some point during follow-up .....  | <b>9</b>  |
| <b>Supplementary Table 4.</b> Mean and standard deviation of DTSQ Scores at 12 months after randomization separately by treatment group, along with pairwise group comparisons ..... | <b>11</b> |
| <b>Supplementary Table 5.</b> DTSQ scores for participants with outcomes present vs. not by month 12 from randomization.....                                                         | <b>12</b> |

## GRADE Research Group (April 30, 2021)

**Designations:** Principal Investigator (PI); Co-Principal Investigator (Co-PI); Co-Investigator (Co-I); Study Coordinator (SC); Recruitment/Retention Coordinator (RC); Research Staff (RS)

### Current Clinical Centers

**Albert Einstein College of Medicine:** Crandall, JP (PI); McKee, MD (Co-PI, past); Behringer-Massera, S (Co-I, past); Brown-Friday, J (SC); Xhori, E (RC, past); Ballentine-Cargill, K (RS); Duran, S (RS); Estrella, H (RS); Gonzalez de la torre, S (RS, past); Lukin, J (RS, past)

**Atlanta VA Medical Center:** Phillips, LS (PI); Burgess, E (Co-I); Olson, D (Co-I); Rhee, M (Co-I); Wilson, P (Co-I); Raines, TS (SC); Boers, J (SC); Costello, J (SC); Maher-Albertelli, M (SC); Mungara, R (SC); Savoye, L (SC, past); White, CA (SC); Gullett, C (SC, past); Holloway, L (SC, past); Morehead, F (SC, past); Person, S (SC, past); Sibymon, M (SC, past); Tanukonda, S (SC, past); Adams, C (RC, past); Ross, A (RC, past)

**Baylor College of Medicine:** Balasubramanyam, A (PI); Gaba, R (Co-I); Gonzalez Hattery, E (SC); Ideozu, A (SC); Jimenez, J (SC); Montes, G (RC); Wright, C (RS, past)

**Baylor Research Institute:** Hollander, P (PI); Roe, E (Co-I, past); Jackson, A (SC); Smiley, A (SC); Burt, P (SC, past); Estrada, L (RS); Chionh, K (RS, past)

**Case Western Reserve University/Cleveland VA/MetroHealth Medical Center:** Ismail-Beigi, F (PI); Falck-Ytter, C (Co-PI); Sayyed Kassem, L (Co-PI); Sood, A (Co-PI, past); Tiktin, M (Co-I, SC); Kulow, T (SC); Newman, C (SC); Stancil, KA (SC); Cramer, B (SC, past); Iacoboni, J (SC, past); Kononets, MV (SC, past); Sanders, C (SC, past); Tucker, L (SC, past); Werner, A (SC, past); Maxwell, A (RS); McPhee, G (RS); Patel, C (RS); Colosimo, L (RS, past); Krol, A (RS, past)

**Columbia University Medical Center:** Goland, R (PI); Pring, J (SC); Alfano, L (SC); Kringas, P (SC, past); Hausheer, C (RC, past); Tejada, J (RC, past); Gumpel, K (RS, past); Kirpitch, A (RS, past); Schneier, H (RS, past)

**Duke University Medical Center:** Green, JB (PI); AbouAssi, H (Co-I); Chatterjee, R (Co-I); Feinglos, MN (Co-I, past); English Jones, J (SC, RC); Khan, SA (SC, RC); Kimpel, JB (SC, past); Zimmer, RP (SC, past); Furst, M (RC, past); Satterwhite, BM (RS); Thacker, CR (RS); Evans Kreider, K (RS, past)

**Indiana University:** Mariash, CN (PI); Mather, KJ (PI, past); Ismail, HM (Co-I); Lteif, A (Co-I, past); Mullen, M (SC); Hamilton, T (SC, past); Patel, N (SC, past); Riera, G (RC); Jackson, M (RC, past); Pirics, V (RC, past); Aguillar, D (RS, past); Howard, D (RS, past); Hurt, S (RS, past)

**International Diabetes Center:** Bergenstal, R (PI); Carlson, A (Co-I); Martens, T (Co-I); Johnson, M (SC); Hill, R (SC); Hyatt, J (SC); Jensen, C (SC); Madden, M (SC); Martin, D (SC); Willis, H (SC); Konerza, W (RS); Yang, S (RS); Kleeberger, K (RS, past); Passi, R (RS, past)

**Kaiser Permanente Northwest:** Fortmann, S (PI); Herson, M (Co-I); Mularski, K (Co-I); Glauber, H (Co-I, past); Prihoda, J (Co-I, past); Ash, B (SC); Carlson, C (SC); Ramey, PA (SC); Schield, E (SC); Torgimson-Ojerio, B (SC); Arnold, K (SC, past); Kauffman, B (SC, past); Panos, E (SC, past); Sahnnow, S (RC); Bays, K (RS); Berame, K (RS); Cook, J (RS); Ghioni, D (RS); Gluth, J (RS); Schell, K (RS); Criscola, J (RS, past); Friason, C (RS, past); Jones, S (RS, past); Nazarov, S (RS, past)

**Kaiser Permanente of Georgia:** Barzilay, J (PI); Rassouli, N (Co-PI); Puttnam, R (Co-I); Ojoawo, B (SC); Nelson, R (RC); Curtis, M (SC, past); Hollis, B (SC, past); Sanders-Jones, C (SC, past); Stokes, K (SC, past); El-Haqq, Z (RS, past); Kolli, A (RS, past); Tran, T (RS, past)

**Massachusetts General Hospital:** Wexler, D (PI); Larkin, ME (Co-I, SC); Meigs, J (Co-I); Chambers, B (SC, past); Dushkin, A (SC, past); Rocchio, G (SC, past); Yepes, M (SC, past); Steiner, B (RC); Dulin, H (RC, past); Cayford, M (RS); Chu, K (RS); DeManbey, A (RS); Hillard, M (RS); Martin, K (RS); Thangthaeng, N (RS); Gurry, L (RS, past); Kochis, R (RS, past); Raymond, E (RS, past); Ripley, V (RS, past); Stevens, C (RS, past)

**MedStar Health Research Institute/ MedStar Baltimore:** Park, J (PI); Aroda, V (PI, past); Ghazi, A (Co-PI); Magee, M (Co-I); Rensing, Ann (Co-I); Loveland, A (SC); Hamm, M (SC); Hurtado, M (SC); Kuhn, A (SC); Leger, J (SC); Manandhar, L (SC); Mwicigi, F (SC); Sanchez, O (SC); Young, T (SC)

**Miami VA Healthcare System/University of Miami:** Garg, R (PI); Lagari-Libhaber, V (PI); Florez, HJ (PI, past); Valencia, WM (PI, past); Marks, J (Co-PI, past); Casula, S (Co-I); Oropesa-Gonzalez, L (SC); Hue, L (SC, past); Cuadot, A (SC, past); Nieto-Martinez, R (SC, past); Riccio Veliz, AK (SC, past); Gutt, M (RC, past); Kendal, YJ (RS, past); Veciana, B. (RS, past)

**Oregon Health & Science University:** Ahmann, A (PI); Aby-Daniel, D (Co-I); Joarder, F (Co-I); Morimoto, V (Co-I); Sprague, C (Co-I); Yamashita, D (Co-I); Cady, N (SC); Rivera-Eschright, N (SC); Kirchhoff, P (SC, past); Morales

Gomez, B (RC); Adducci, J (RC, past); Goncharova, A (RC, past)

**Pacific Health Research and Education Institute/VA Pacific Islands:** Hox, SH (PI); Petrovitch, H (Co-PI); Matwichyna, M (SC); Jenkins, V (SC, past); Broadwater, L (RS); Ishii, RR (RS); Bermudez, NO (RS; past)

**Pennington Biomedical Research Center:** Hsia, DS (PI); Cefalu, WT (PI, past); Greenway, FL (Co-I); Waguespack, C (Co-I); King, E (SC); Fry, G (SC); Dragg, A (SC); Gildersleeve, B (SC); Arceneaux, J (SC); Haynes, N (SC, past); Thomassie, A (SC, past); Pavlionis, M (SC, past); Bourgeois, B (RC, past); Hazlett, C (RS)

**San Diego VA Medical Center:** Mudaliar, S (PI); Henry, R (PI, past); Boeder, S (Co-I, past); Pettus, J (Co-I, past); Diaz, E (SC); Garcia-Acosta, D (SC); Maggs, S (SC); DeLue, C (SC, past); Stallings, A (SC, past); Castro, E (RC, past); Hernandez, S (RC, past)

**Southwestern American Indian Center:** Krakoff, J (PI); Curtis, JM (Co-I); Killeen, T (SC); Khalid, M (SC); Joshevama, E (RC, past); Diaz, E (RS); Martin, D (RS); Tsingine, K (RS); Karshner, T (RS, past)

**St. Luke's-Roosevelt Hospital:** Albu, J (Co-PI); Pi-Sunyer, FX (Co-PI, past); Frances, S (Co-I); Maggio, C (SC, past); Ellis, E (RC); Bastawrose, J (RC, past); Gong, X (RS)

**SUNY Downstate Medical Center/New York Hospital-Queens:** Banerji, MA (PI); August, P (Co-I); Lee, M (Co-I); Lorber, D (Co-I); Brown, NM (SC, RC); Josephson, DH (SC); Thomas, LL (SC, RC); Tsovan, M (SC, RC); Cherian, A (SC, RC, past); Jacobson, MH (RS); Mishko, MM (RS)

**The University of North Carolina Diabetes Care Center:** Kirkman, MS (PI); Buse, JB (Co-I); Diner, J (Co-I); Dostou, J (Co-I); Machineni, S (Co-I); Young, L (Co-I); Bergamo, K (Co-I, past); Goley, A (Co-I, past); Kerr, J (Co-I, past); Largay, JF (Co-I, past); Guarda, S (SC); Cuffee, J (SC, past); Culmer, D (SC, past); Fraser, R (RC); Almeida, H (RC, past); Coffey, S (RC, past); Debnam, E (RC, past); Kiker, L (RC, past); Morton, S (RC, past); Josey, K (RS); Fuller, G (RS, past)

**University of Alabama Birmingham:** Garvey, WT (PI); Cherrington, AL (Co-PI); Dyer, D (SC); Lawson, MCR (SC); Griffith, O (SC, past); Agne, A (RC); McCullars, S (RC)

**University of Cincinnati/Cincinnati VA Medical Center:** Cohen, RM (PI); Craig, J (SC); Rogge, MC (SC; past); Burton, K (SC, past); Kersey, K (SC, RC, past); Wilson, C (SC, past); Lipp, S (RC, past); Vonder Meulen, MB (RC, past); Adkins, C (RS); Onadeko, T (RS)

**University of Colorado-Denver/VA:** Rasouli, N (PI); Baker, C (Co-I); Schroeder, E (Co-I, past); Razzaghi, M (Co-I); Lyon, C (Co-I, past); Penaloza, R (Co-I, past); Underkofler, C (SC); Lorch, R (SC); Douglass, S (SC, past); Steiner, S (SC, past)

**University of Iowa:** Sivitz, WI (PI); Cline, E (SC); Knosp, LK (SC); McConnell, J (SC, past); Lowe, T (RC)

**University of Michigan:** Herman, WH (PI); Pop-Busui, R (Co-PI); Tan, MH (Co-I); Martin, C (SC); Waltje, A (SC, RC); Katona, A (SC); Goodhall, L (SC, past); Eggleston, R (RC, past); Kuo, S (RS); Bojesco, S (RS, past); Bule, S (RS, past); Kessler, N (RS, past); LaSalle, E (RS, past); Whitley, K (RS, past)

**University of Minnesota:** Seaquist, ER (PI); Bantle, A (Co-I); Harindhanavudhi, T (Co-I); Kumar, A (Co-I); Redmon, B (Co-I); Bantle, J (Co-I, past); Coe, M (SC); Mech, M (SC); Taddese, A (RC); Lesne, L (RS); Smith, S (RS)

**University of Nebraska Medical Center/Omaha VA:** Desouza, C (PI); Kuechenmeister, L (Co-I); Shivaswamy, V (Co-I); Burbach, S (SC); Rodriguez, MG (SC); Seipel, K (SC); Alfred, A (SC, past); Morales, AL (SC, past); Eggert, J (RS); Lord, G (RS); Taylor, W (RS, past); Tillson, R (RS, past)

**University of New Mexico:** Schade, DS (PI); Adolphe, A (Co-PI); Burge, M (Co-PI, past); Duran-Valdez, E (SC); Martinez, J (RC, past); Bancroft, A (RS); Kunkel, S (RS); Ali Jamaledin Ahmad, F (RS, past); Hernandez McGinnis, D (RS, past); Pucchetti, B (RS, past); Scripsick, E (RS, past); Zamorano, A (RS, past)

**UT Health San Antonio:** DeFronzo, RA (PI); Cersosimo, E (Co-PI); Abdul-Ghani, M (Co-I); Triplitt, C (Co-I); Juarez, D (SC); Mullen, M (SC); Garza, RI (SC, past); Verastiqui, H (SC, past); Wright, K (RC, past); Puckett, C (RS)

**University of Texas-Southwestern Medical Center:** Raskin, P (PI); Rhee, C (Co-I, past); Abraham, S (SC); Jordan, LF (SC); Sao, S (SC); Morton, L (SC, past); Smith, O (SC, past); Osornio Walker, L (RC, past); Schnurr-Breen, L (RC, past); Ayala, R (RS); Kreymer, RB (RS); Sturgess, D (RS, past)

**VA Puget Sound Health Care System/University of Washington:** Utzschneider, KM (PI); Kahn, SE (Co-I); Alarcon-Casas Wright, L (Co-I); Boyko, EJ (Co-I); Tsai, EC (Co-I); Trencce, DL (Co-I, past); Trikudanathan, S (Co-I, past); Fattaleh, BN (SC); Montgomery, BK (SC, past); Atkinson, KM (RS); Kozedub, A (RS); Concepcion, T (RS, past); Moak, C (RS, past); Prikhodko, N (RS, past); Rhothisen, S (RS, past)

**Vanderbilt University:** Elasy, TA (PI); Martin, S (SC); Shackelford, L (RC, RS, past); Goidel, R (RS); Hinkle, N (RS); Lovell, C (RS); Myers, J (RS); Lipps Hogan, J (RS, past)

**Washington University:** McGill, JB (PI); Salam, M (Co-I); Schweiger, T (SC, RC); Kissel, S (SC, RC, past); Recklein, C (SC, past); Clifton, MJ (RS)

**Yale University/Fair Haven Community Health Center/West Haven VA Medical Center:** Tamborlane, W

(PI); Camp, A (Co-I); Gulanski, B (Co-I); Inzucchi, SE (Co-I); Pham, K (Co-I); Alguard, M (SC, RC); Gatcomb, P (SC); Lessard, K (SC); Perez, M (SC); Iannone, L (RC); Magenheimer, E (RC); Montosa, A (RC)

## Study Units

**NIH/NIDDK (Sponsor):** Cefalu, WT (Director, Division of Diabetes, Endocrinology and Metabolic Diseases); Fradkin, J (Director, Division of Diabetes, Endocrinology and Metabolic Diseases, past); Burch, HB (Project Scientist); Bremer, AA (Project Scientist, past)

**Chairman's Office, Massachusetts General Hospital, Harvard Medical School:** Nathan, DM (Study Chair, Study Co-PI)

**Executive Committee:** Nathan, DM (Study Chair, Study Co-PI); Lachin, JM (U01 Contact PI, Study Co-PI); Buse, JB (Co-I); Kahn, SE (Co-I); Krause-Steinrauf, H (Co-I, Project Director); Larkin, ME (Co-I, SC); Tiktin, M (Co-I, SC); Wexler, D (PI); Burch, HB (Program Scientist); Bremer, AA (Project Scientist, past)

**Coordinating Center, The George Washington University Biostatistics Center:** Lachin, JM (U01 Contact PI, Study Co-PI); Krause-Steinrauf, H (Co-I, Project Director); Younes, N (Co-I); Bebu, I (RS); Butera, N (RS); Buys, CJ (RS); Fagan, A (RS); Gao, Y (RS); Ghosh, A (RS); Gramzinski, MR (RS); Hall, SD (RS); Kazemi, E (RS); Legowski, E (RS); Liu, H (RS); Suratt, C (RS); Tripputi, M (RS); Arey, A (RS, past); Backman, M (RS, past); Bethupu, J (RS, past); Lund, C (RS, past); Mangat Dhaliwal, P (RS, past); McGee, P (RS, past); Mesimer, E (RS, past); Ngo, L (RS, past)

**Central Biochemical Laboratory, University of Minnesota Advanced Research and Diagnostic Laboratory:** Steffes, M (PI); Seegmiller, J (Co-I); Saenger, A (Co-I, past); Arends, V (SC); Gabrielson, D (SC, past)

**Drug Distribution Center, VA Cooperative Studies Program Clinical Research Pharmacy Coordinating Center:** Conner, T (PI); Warren, S (PI, past); Day, J (RS); Huminik, J (RS); Scrymgeour, A (RS)

**ECG Reading Center, EPICARE, Wake Forest University:** Soliman, EZ (PI); Pokharel, Y (PI, past), Zhang, ZM (Co-I, past); Campbell, C (SC); Hu, J (SC); Keasler, L (SC); Hensley, S (SC, past); Li, Y (RS)

### **Economic Evaluation and Assessment Center:**

**University of Michigan:** Herman, WH (PI); Kuo, S (RS); Martin, C (SC); Waltje, A (SC, RC); Mihalcea, R (RS); Min, DJ (RS); Perez-Rosas, V (RS); Prosser, L (RS); Resnicow, K (RS); Ye, W (RS)

**Centers for Disease Control and Prevention:** Shao, H (RS); Zhang, P (RS)

**Neurocognitive Coordinating Center, Columbia University Medical Center:** Luchsinger, J (PI); Sanchez, D (SC); Assuras, S (RS)

**QWB Reading Center, University of California San Diego Health Services Research Center:** Groessl, E (PI); Sakha, F (SC); Chong, H (SC, past); Hillery, N (RS)

## Collaborators

**Cardiovascular Adjudication Advisor:** Everett, BM (Brigham and Women's Hospital)

**Collaborating Investigators (Recruitment Sites):** Abdouch, I (University of Nebraska Medical Center/Omaha VA); Bahtiyar, G (SUNY Downstate Medical Center); Brantley, P (Pennington Biomedical Research Center (LSU)); Broyles, FE (Swedish Medical Center); Canaris, G (University of Nebraska Medical Center/Omaha VA); Copeland, P (Massachusetts General Hospital); Craine, JJ (UW Valley Medical Center); Fein, WL (Swedish Medical Center); Gliwa, A (SUNY Downstate Medical Center); Hope, L (SUNY Downstate Medical Center); Lee,

MS (SUNY Downstate Medical Center); Meiners, R (Pennington Biomedical Research Center (LSU)); Meiners, V (Pennington Biomedical Research Center (LSU)); O'Neal, H (Pennington Biomedical Research Center (LSU)); Park, JE (UW Valley Medical Center); Sacerdote, A (SUNY Downstate Medical Center; Sledge, Jr., E (Pennington Biomedical Research Center (LSU)); Soni, L (SUNY Downstate Medical Center); Steppel-Reznik, J (Massachusetts General Hospital); Turchin, A (Massachusetts General Hospital)

**Beta Cell Ancillary Study:** Brooks-Worrell, B (University of Washington); Hampe, CS (University of Washington); Palmer, JP (University of Washington); Shojaie, A (University of Washington)

**Continuous Glucose Monitoring Sub-study:** Higgins, J (Massachusetts General Hospital; Harvard Medical School)

**Emotional Distress Sub-study:** Golden, S (Johns Hopkins University); Gonzalez, J (Yeshiva University; Albert Einstein College of Medicine); Naik, A (Baylor College of Medicine); Walker, E (Albert Einstein College of Medicine)

**National Diabetes Education Program (NDEP) Sub-study:** Doner Lotenberg, L (Hager Sharp); Gallivan, JM (National Institutes of Health); Lim, J (Hager Sharp); Tuncer, DM (National Institutes of Health)

**Recruitment Ancillary Study:** Behringer-Massera, S (The Mount Sinai Hospital, Beth Israel Medical Center)

**Supplementary Table 1.** Baseline table of the GRADE participant cohort (n=5,047) by treatment group

|                            | All                | Glargine           | Glimepiride        | Liraglutide        | Sitagliptin        |
|----------------------------|--------------------|--------------------|--------------------|--------------------|--------------------|
| N                          | 5,047              | 1,263              | 1,254              | 1,262              | 1,268              |
| <i>Demographics</i>        |                    |                    |                    |                    |                    |
| Age (years)                | 57.7 [50.3, 64.7]  | 57.3 [50.0, 64.2]  | 57.7 [50.3, 64.7]  | 58.1 [50.7, 64.8]  | 57.3 [50.3, 65.0]  |
| Female                     | 1,837 (36.4%)      | 452 (35.8%)        | 476 (38.0%)        | 439 (34.8%)        | 470 (37.1%)        |
| Race                       |                    |                    |                    |                    |                    |
| Am Ind/Alaska Native       | 137 (2.7%)         | 33 (2.6%)          | 30 (2.4%)          | 40 (3.2%)          | 34 (2.7%)          |
| Asian                      | 182 (3.6%)         | 34 (2.7%)          | 47 (3.7%)          | 47 (3.7%)          | 54 (4.3%)          |
| Hawaiian/Pacific Isl       | 28 (0.6%)          | 5 (0.4%)           | 7 (0.6%)           | 8 (0.6%)           | 8 (0.6%)           |
| Black or African-American  | 1,000 (19.8%)      | 253 (20.0%)        | 271 (21.6%)        | 251 (19.9%)        | 225 (17.7%)        |
| White                      | 3,314 (65.7%)      | 837 (66.3%)        | 808 (64.4%)        | 815 (64.6%)        | 854 (67.4%)        |
| Other/multiple             | 319 (6.3%)         | 82 (6.5%)          | 71 (5.7%)          | 82 (6.5%)          | 84 (6.6%)          |
| Unknown/not reported       | 67 (1.3%)          | 19 (1.5%)          | 20 (1.6%)          | 19 (1.5%)          | 9 (0.7%)           |
| Hispanic/Latino            | 929 (18.4%)        | 220 (17.4%)        | 234 (18.7%)        | 234 (18.5%)        | 241 (19.0%)        |
| Education                  |                    |                    |                    |                    |                    |
| < HS                       | 364 (7.2%)         | 92 (7.3%)          | 99 (7.9%)          | 84 (6.7%)          | 89 (7.0%)          |
| HS Graduate                | 1,039 (20.6%)      | 248 (19.6%)        | 255 (20.3%)        | 267 (21.2%)        | 269 (21.2%)        |
| Some college               | 1,463 (29.0%)      | 397 (31.4%)        | 354 (28.2%)        | 378 (30.0%)        | 334 (26.4%)        |
| College degree or greater  | 2,180 (43.2%)      | 526 (41.6%)        | 546 (43.5%)        | 533 (42.2%)        | 575 (45.4%)        |
| Current Smoker             | 695 (13.8%)        | 158 (12.5%)        | 183 (14.6%)        | 170 (13.5%)        | 184 (14.5%)        |
| Alcohol Use                |                    |                    |                    |                    |                    |
| Never                      | 1,679 (33.3%)      | 416 (32.9%)        | 410 (32.7%)        | 436 (34.5%)        | 417 (32.9%)        |
| Occasionally               | 2,619 (51.9%)      | 670 (53.0%)        | 678 (54.1%)        | 627 (49.7%)        | 644 (50.8%)        |
| Weekly                     | 563 (11.2%)        | 142 (11.2%)        | 129 (10.3%)        | 148 (11.7%)        | 144 (11.4%)        |
| Daily                      | 186 (3.7%)         | 35 (2.8%)          | 37 (3.0%)          | 51 (4.0%)          | 63 (5.0%)          |
| <i>Diabetes Parameters</i> |                    |                    |                    |                    |                    |
| Duration (years)           | 3.8 [1.9, 6.3]     | 3.8 [1.9, 6.2]     | 3.9 [1.9, 6.6]     | 3.9 [1.8, 6.4]     | 3.8 [1.9, 6.2]     |
| HbA1c (%)                  | 7.4 [7.1, 7.8]     | 7.4 [7.1, 7.9]     | 7.4 [7.1, 7.8]     | 7.4 [7.1, 7.9]     | 7.4 [7.1, 7.9]     |
| HbA1c (mmol/mol)           | 57.4 [54.1, 61.8]  | 57.4 [54.1, 62.8]  | 57.4 [54.1, 61.8]  | 57.4 [54.1, 62.8]  | 57.4 [54.1, 62.8]  |
| <i>Anthropometrics</i>     |                    |                    |                    |                    |                    |
| Weight (kg)                | 98.0 [84.4, 112.3] | 98.4 [85.7, 112.6] | 97.7 [83.5, 112.4] | 98.1 [84.5, 113.2] | 98.1 [84.1, 111.4] |
| BMI (kg/m <sup>2</sup> )   | 33.3 [29.5, 38.0]  | 33.4 [29.5, 38.1]  | 33.1 [29.3, 38.4]  | 33.6 [29.7, 37.8]  | 33.1 [29.1, 37.7]  |

|                                 |                      |                      |                      |                      |                      |
|---------------------------------|----------------------|----------------------|----------------------|----------------------|----------------------|
| Waist (cm)                      | 111.3 [101.2, 121.8] | 111.3 [101.3, 121.8] | 111.5 [100.5, 122.5] | 111.2 [101.5, 122.2] | 111.3 [101.2, 121.0] |
| <i>Blood Pressure (BP)</i>      |                      |                      |                      |                      |                      |
| Systolic BP (mmHg)              | 127.5 [118.0, 137.5] | 128.0 [118.0, 137.5] | 127.5 [118.5, 138.0] | 127.0 [118.0, 137.5] | 127.5 [117.5, 137.5] |
| Diastolic BP (mmHg)             | 77.0 [70.5, 83.5]    | 77.0 [70.5, 84.0]    | 77.0 [70.5, 83.0]    | 77.5 [71.0, 84.0]    | 77.0 [70.5, 83.5]    |
| ACEi/ARB use                    | 2,933 (58.1%)        | 724 (57.3%)          | 742 (59.2%)          | 738 (58.5%)          | 729 (57.5%)          |
| Any antihypertensive use        | 3,496 (69.3%)        | 882 (69.8%)          | 865 (69.0%)          | 890 (70.5%)          | 859 (67.7%)          |
| Hypertension History            | 3,339 (66.2%)        | 845 (66.9%)          | 834 (66.5%)          | 843 (66.8%)          | 817 (64.4%)          |
| <i>Lipids</i>                   |                      |                      |                      |                      |                      |
| Total Cholesterol (mg/dL)       | 160.0 [137.0, 186.0] | 162.0 [137.0, 187.0] | 158.0 [136.0, 186.0] | 161.0 [137.8, 187.0] | 160.0 [136.0, 185.0] |
| HDL (mg/dL)                     | 41.0 [36.0, 49.0]    | 41.0 [36.0, 48.0]    | 42.0 [36.0, 49.0]    | 41.0 [36.0, 49.0]    | 41.0 [36.0, 49.0]    |
| LDL (mg/dL)                     | 87.0 [68.0, 109.0]   | 88.0 [69.0, 112.0]   | 86.0 [67.0, 107.0]   | 89.0 [68.0, 111.0]   | 86.0 [68.0, 107.0]   |
| Triglycerides (mg/dL)           | 87.0 [68.0, 109.0]   | 88.0 [69.0, 112.0]   | 86.0 [67.0, 107.0]   | 89.0 [68.0, 111.0]   | 86.0 [68.0, 107.0]   |
| Lipid lowering medication       | 3,321 (65.8%)        | 825 (65.3%)          | 857 (68.3%)          | 795 (63.0%)          | 844 (66.6%)          |
| <i>DTSQ with metformin only</i> |                      |                      |                      |                      |                      |
| DTSQ summary score              | 33.0 [29.0, 36.0]    | 33.0 [29.0, 36.0]    | 33.0 [29.5, 36.0]    | 33.0 [29.0, 36.0]    | 33.0 [30.0, 36.0]    |

---

Continuous variables (e.g., HbA1c) are described using median (with 1<sup>st</sup> and 3<sup>rd</sup> quartiles), while categorical variables (e.g., sex) are described using as counts (with percent).

**Supplementary Table 2.** The percent change<sup>1</sup> in treatment effect on the risk of the composite outcome after adjustment for potential mediators.

| Mediators                       | Pairwise Treatment Group Comparisons |                         |                         |                            |                            |                            |
|---------------------------------|--------------------------------------|-------------------------|-------------------------|----------------------------|----------------------------|----------------------------|
|                                 | Glimepiride vs Glargine              | Liraglutide vs Glargine | Sitagliptin vs Glargine | Liraglutide vs Glimepiride | Sitagliptin vs Glimepiride | Sitagliptin vs Liraglutide |
| Metformin Adherence             | 0.71 (-1.47, 2.89)                   | -0.97 (-3.00, 1.06)     | -5.52 (-18.97, 7.92)    | -0.29 (-1.22, 0.63)        | -0.94 (-2.64, 0.75)        | 0.71 (-1.51, 2.93)         |
|                                 |                                      |                         |                         |                            |                            |                            |
| Randomized Medication Adherence | -0.43 (-1.76, 0.91)                  | 0.96 (-0.16, 2.08)      | -3.91 (-13.01, 5.18)    | 0.35 (-0.06, 0.77)         | -1.07 (-2.34, 0.20)        | 3.53 (-0.42, 7.48)         |
|                                 |                                      |                         |                         |                            |                            |                            |
| Smoking status                  | 1.00 (-1.11, 3.11)                   | -0.77 (-2.37, 0.83)     | 1.50 (-2.42, 5.42)      | -0.12 (-0.48, 0.23)        | 0.86 (-0.36, 2.08)         | -2.22 (-6.18, 1.74)        |
|                                 |                                      |                         |                         |                            |                            |                            |
| Alcohol use                     | 1.23 (-1.43, 3.91)                   | 0.22 (-0.57, 1.01)      | 4.68 (-5.79, 15.16)     | 0.42 (-0.37, 1.22)         | 1.72 (-0.66, 4.11)         | -1.74 (-4.33, 0.85)        |

<sup>1</sup>The percent change in the treatment effect (unadjusted for the mediator – adjusted for the mediator) with Holm corrected 95% confidence intervals in parentheses. Note, negative change indicates that the magnitude of the treatment effect was increased by including the mediator in the model. Asterisk superscripts indicate the p-value for the test of percent change equal to zero. The levels of significance are: \*: p<0.05, \*\*: p<0.01, \*\*\*: p<0.001. The p-values are Holm corrected for 6- pairwise treatment group comparisons. If no asterisk superscripts appear then the percent change in the treatment effect is not significantly different from zero.



**Supplementary Table 3.** Treatment group comparisons of outcomes by rescue insulin status (addition of mealtime insulin for group randomized to glargine and addition of glargine for those randomized to other therapies) among participants who initiated rescue insulin at some point during follow-up (n=1577).

| Outcomes <sup>1</sup>                                                  | Treatment Group                  |                                 |                            |                            |
|------------------------------------------------------------------------|----------------------------------|---------------------------------|----------------------------|----------------------------|
|                                                                        | Glargine                         | Glimepiride                     | Liraglutide                | Sitagliptin                |
| <b>HbA1c %</b>                                                         |                                  |                                 |                            |                            |
| <i>Number of participants<sup>5</sup></i>                              | 222                              | 411                             | 399                        | 545                        |
| <i>Mean (SE)<sup>4</sup></i>                                           |                                  |                                 |                            |                            |
| Before insulin                                                         | 8.30 (0.06)                      | 8.10 (0.05)                     | 8.12 (0.05)                | 8.23 (0.04)                |
| After insulin                                                          | 7.89 (0.07)                      | 7.55 (0.05)                     | 7.37 (0.06)                | 7.32 (0.05)                |
| Difference (before – after)                                            | 0.41 (0.07) <sup>***</sup>       | 0.56 (0.05) <sup>***</sup>      | 0.75 (0.06) <sup>***</sup> | 0.91 (0.05) <sup>***</sup> |
| Difference (CI) pairwise treatment after rescue insulin initiated      |                                  |                                 |                            |                            |
| vs. Glimepiride                                                        | 0.35 (0.13, 0.57) <sup>***</sup> |                                 |                            |                            |
| vs. Liraglutide                                                        | 0.52 (0.28, 0.76) <sup>***</sup> | 0.17 (0.01, 0.34) <sup>*</sup>  |                            |                            |
| vs. Sitagliptin                                                        | 0.58 (0.35, 0.81) <sup>***</sup> | 0.23 (0.07, 0.39) <sup>**</sup> | 0.06 (-0.09, 0.20)         |                            |
| <b>Weight gain ≥ 5%</b>                                                |                                  |                                 |                            |                            |
| <i>Number of participants<sup>5</sup></i>                              | 222                              | 411                             | 398                        | 544                        |
| <i>Number of cases (%)</i>                                             |                                  |                                 |                            |                            |
| Before rescue insulin                                                  | 121 (54.5%)                      | 187 (45.5%)                     | 82 (20.6%)                 | 123 (22.6%)                |
| After rescue insulin                                                   | 31 (14.0%)                       | 53 (12.9%)                      | 79 (19.9%)                 | 129 (23.7%)                |
| <i>Patient years<sup>2</sup></i>                                       |                                  |                                 |                            |                            |
| Before rescue insulin                                                  | 426.32                           | 831.94                          | 1012.82                    | 1173.87                    |
| After rescue insulin                                                   | 184.44                           | 411.84                          | 593.44                     | 813.69                     |
| <i>Event Rate/100yrs(SE)</i>                                           |                                  |                                 |                            |                            |
| Before rescue insulin                                                  | 28.4 (2.6)                       | 22.5 (1.8)                      | 8.1 (0.8)                  | 10.5 (1.0)                 |
| After rescue insulin                                                   | 16.8 (3.1)                       | 12.9 (1.8)                      | 13.3 (1.6)                 | 15.9 (1.5)                 |
| <i>RR (SE) before vs after rescue insulin<sup>3</sup></i>              | 1.69 (0.35) <sup>*</sup>         | 1.75 (0.29) <sup>**</sup>       | 0.61 (0.10) <sup>**</sup>  | 0.66 (0.09) <sup>**</sup>  |
| RR (SE) pairwise treatment comparison after rescue insulin initiated   |                                  |                                 |                            |                            |
| vs. Glimepiride                                                        | 1.31 (0.70, 2.42)                |                                 |                            |                            |
| vs. Liraglutide                                                        | 1.26 (0.71, 2.25)                | 0.97 (0.59, 1.57)               |                            |                            |
| vs. Sitagliptin                                                        | 1.06 (0.61, 1.83)                | 0.81 (0.52, 1.27)               | 0.84 (0.57, 1.24)          |                            |
| <b>Any Hypoglycemia</b>                                                |                                  |                                 |                            |                            |
| <i>Number of participants<sup>5</sup></i>                              | 221                              | 409                             | 392                        | 542                        |
| <i>Number of cases (%)</i>                                             |                                  |                                 |                            |                            |
| Before rescue insulin                                                  | 64 (29.0%)                       | 150 (36.7%)                     | 57 (14.5%)                 | 57 (10.5%)                 |
| After rescue insulin                                                   | 55 (24.9%)                       | 118 (28.9%)                     | 91 (23.2%)                 | 145 (26.8%)                |
| <i>Patient years<sup>2</sup></i>                                       |                                  |                                 |                            |                            |
| Before rescue insulin                                                  | 570.86                           | 905.66                          | 1014.84                    | 1260.90                    |
| After rescue insulin                                                   | 303.42                           | 514.65                          | 711.37                     | 1134.18                    |
| <i>Event Rate/100yrs(SE)</i>                                           |                                  |                                 |                            |                            |
| Before rescue insulin                                                  | 11.2 (1.3)                       | 16.6 (1.3)                      | 5.6 (0.7)                  | 4.5 (0.6)                  |
| After rescue insulin                                                   | 18.1 (2.5)                       | 22.9 (2.2)                      | 12.8 (1.3)                 | 12.8 (1.1)                 |
| <i>RR (SE) before vs after insulin<sup>3</sup></i>                     | 0.62 (0.11) <sup>*</sup>         | 0.72 (0.09) <sup>*</sup>        | 0.44 (0.07) <sup>***</sup> | 0.35 (0.06) <sup>***</sup> |
| RR (CI) pairwise treatment after rescue insulin initiated <sup>4</sup> |                                  |                                 |                            |                            |

|                 |                   |                      |                   |  |
|-----------------|-------------------|----------------------|-------------------|--|
| vs. Glimepiride | 0.79 (0.51, 1.23) |                      |                   |  |
| vs. Liraglutide | 1.42 (0.90, 2.24) | 1.79 (1.23, 2.62)*** |                   |  |
| vs. Sitagliptin | 1.42 (0.93, 2.17) | 1.79 (1.28, 2.52)*** | 1.00 (0.70, 1.43) |  |

<sup>1</sup>The weight and hypoglycemia components of the composite outcome are presented along with mean HbA1c. The HbA1c component of the composite outcome (time to A1c > 7.5%, confirmed) cannot be included in this analysis because insulin status is based on it.

<sup>2</sup>Patient years for the weight and hypoglycemia outcomes represent the total follow-up time at risk for the specific outcome.

<sup>3</sup>RR is the rate ratio (SE) in the period before vs after rescue insulin.

<sup>4</sup>RR is the rate ratio (95% CI) between pairwise treatment groups (column group vs row group) in the period after rescue insulin is initiated.

<sup>5</sup>The number of participants vary depending on availability of post-randomization data for the specific outcome.

The following superscripts are used to denote statistical significance: \* $0.01 < p \leq 0.05$ , \*\* $0.001 < p \leq 0.01$ , \*\*\* $p \leq 0.001$ . The p-values from the 4 tests (one for each of the four treatment groups) of the rate ratios before vs after rescue insulin are Holm adjusted for 4 tests. The p-values from the tests of pairwise treatment group rate ratios in the period after initiation of rescue insulin are Holm adjusted for 6 pairwise comparisons.

**Supplementary Table 4.** Mean and standard deviation of DTSQ Scores at 12 months after randomization separately by treatment group, along with pairwise group comparisons.

|                                   | <b>Treatment Group</b> |                     |                    |                    |
|-----------------------------------|------------------------|---------------------|--------------------|--------------------|
|                                   | <b>Glargine</b>        | <b>Glimepiride</b>  | <b>Liraglutide</b> | <b>Sitagliptin</b> |
| Number of Participants            | 1188                   | 1197                | 1203               | 1205               |
| DTSQ Score                        | 32.69 (0.11)           | 32.93 (0.11)        | 33.15 (0.11)       | 33.05 (0.11)       |
| Pairwise Comparisons <sup>1</sup> |                        |                     |                    |                    |
| vs. Glimepiride                   | -0.25 (-0.64, 0.15)    |                     |                    |                    |
| vs. Liraglutide                   | -0.46 (-0.86, -0.06)*  | -0.21 (-0.61, 0.18) |                    |                    |
| vs. Sitagliptin                   | -0.37 (-0.76, 0.03)    | -0.12 (-0.52, 0.28) | 0.09 (-0.30, 0.49) |                    |

Results based on a linear model of DTSQ at 12 months adjusted for baseline DTSQ.

<sup>1</sup>The following superscripts are used to denote statistical significance for pairwise comparisons: \*  $0.01 < p \leq 0.05$ ;

\*\*  $0.001 < p \leq 0.01$ ; \*\*\*  $p \leq 0.001$ . Note that p-values and 95% confidence intervals are Holm adjusted for the 6 pairwise treatment comparisons of mean DTSQ score at 1-year.

**Supplementary Table 5.** DTSQ scores for participants with outcomes present vs. not by month 12 from randomization.

|                          | <b>Number of participants<br/>(n = 4793)</b> | <b>DTSQ Score<br/>Mean (SE)</b> | <b>Difference (95% CI)</b>          |
|--------------------------|----------------------------------------------|---------------------------------|-------------------------------------|
| <b>Composite Outcome</b> |                                              |                                 |                                     |
| Yes                      | 1186                                         | 32.52 (0.11)                    | Yes - No                            |
| No                       | 3607                                         | 33.10 (0.06)                    | -0.59 (-0.83, -0.34) <sup>***</sup> |
| <b>HbA1c &gt;7.5%</b>    |                                              |                                 |                                     |
| Yes                      | 518                                          | 31.96 (0.16)                    | Yes - No                            |
| No                       | 4275                                         | 33.08 (0.06)                    | -1.12 (-1.45, -0.78) <sup>***</sup> |
| <b>Weight gain ≥ 5%</b>  |                                              |                                 |                                     |
| Yes                      | 523                                          | 32.82 (0.16)                    | Yes - No                            |
| No                       | 4270                                         | 32.97 (0.06)                    | -0.15 (-0.49, 0.19)                 |
| <b>Hypoglycemia</b>      |                                              |                                 |                                     |
| Yes                      | 301                                          | 32.90 (0.21)                    | Yes - No                            |
| No                       | 4492                                         | 32.96 (0.05)                    | -0.06 (-0.50, 0.37)                 |

The following superscripts are used to denote statistical significance: \*  $0.01 < p \leq 0.05$ ; \*\*  $0.001 < p \leq 0.01$ ; \*\*\*  $p \leq 0.001$ .

Means (SE) are estimated from a linear model of DTSQ at 12 months adjusted for treatment group and baseline DTSQ score. The exposure variable is an indicator (no vs yes) for having reached the various outcomes prior to 1-year post-randomization.
